# Supplementary material for: Correlates of Quality of Life in Older Adults With Diabetes: The Diabetes & Aging Study
Source: PubMed Central journal article supplement — Diabetes Care. 2011 Jul 16;34(8):1749–53. doi: 10.2337/dc10-2424 (PMC3142040; doi:10.2337/dc10-2424), 2011-07-16
Supplement: supp_dc10-2424v102424_DC102424SupplementaryData.pdf [file supp_dc10-2424v102424_DC102424SupplementaryData.pdf]

SUPPLEMENTARY DATA

**Supplementary Table 1.** Sources of Data for Exposures of Interest

| Exposures                |                                | Source(s) of Data                                                                                                                              | ICD-9 / CPT Codes |
|--------------------------|--------------------------------|------------------------------------------------------------------------------------------------------------------------------------------------|-------------------|
| Geriatric syndromes      |                                |                                                                                                                                                |                   |
| Chronic pain             | Outpatient                     | 339.0-339.4, 339.8, 346.00-346.03, 346.10-346.13, 346.20-346.23, 346.40-346.43, 346.5-346.6, 346.70-346.73, 377.2, 710-727, 729.0-729.9, 784.0 |                   |
| Depression               | Outpatient                     | 296.2, 296.3, 298.0, 300.4, 309.0, 309.1, 309.28, 311                                                                                          |                   |
| Falls                    | Outpatient and inpatient       | E880-E888                                                                                                                                      |                   |
| Underweight              | Outpatient and DISTANCE survey | not applicable                                                                                                                                 |                   |
| Urinary Incontinence     | Outpatient                     | 788.3                                                                                                                                          |                   |
| Diabetic complications   |                                |                                                                                                                                                |                   |
| Amputation               | Outpatient and procedure code  | 84.10-84.19, 27290, 27295, 27598, 27880-27882, 27884, 27886, 27888, 27889, 28800, 28805, 28810, 28820, 28825                                   |                   |
| Blindness                | Outpatient                     | 369                                                                                                                                            |                   |
| Congestive heart failure | Inpatient                      | 402.01, 402.11, 402.91                                                                                                                         |                   |
| ESRD                     | Kaiser ESRD registry           | not applicable                                                                                                                                 |                   |
| Foot ulcer               | Outpatient and inpatient       | 249.80-249.81, 250.80- 250.83, 707.1                                                                                                           |                   |
| Myocardial infarction    | Inpatient                      | 410, 412                                                                                                                                       |                   |
| Peripheral neuropathy    | Outpatient                     | 250.60-250.63, 337.0, 337.1,                                                                                                                   |                   |

SUPPLEMENTARY DATA

|  |              |                          |                                                                                                                                          |
|--|--------------|--------------------------|------------------------------------------------------------------------------------------------------------------------------------------|
|  |              |                          | 337.9, 349.9, 353.0, 353.1,<br>354.1, 354.8-355.0, 355.2-<br>355.4, 355.6, 355.79, 355.8-<br>356.0, 356.9, 357.2, 713.5,<br>723.4, 729.2 |
|  | Stroke       | Inpatient                | 431, 433-5                                                                                                                               |
|  | Hypoglycemia | Outpatient and inpatient | 251.0-251.2                                                                                                                              |

Abbreviations: CPT, Current Procedural Terminology; ESRD, end-stage renal disease; ICD-9, International Statistical Classification of Diseases and Related Health Problems-9
